# Supplementary material for: Intestinal Region-Specific and Layer-Dependent Induction of TNFα in Rats with Streptozotocin-Induced Diabetes and after Insulin Replacement
Source: MDPI journal article supplement (doi:10.3390/cells10092410), 2021-09-13
Supplement: s1 [file s1]

Supplementary Materi

See the attached pdf file.

Figure S1. Datasheet of TNF $\alpha$  antibody

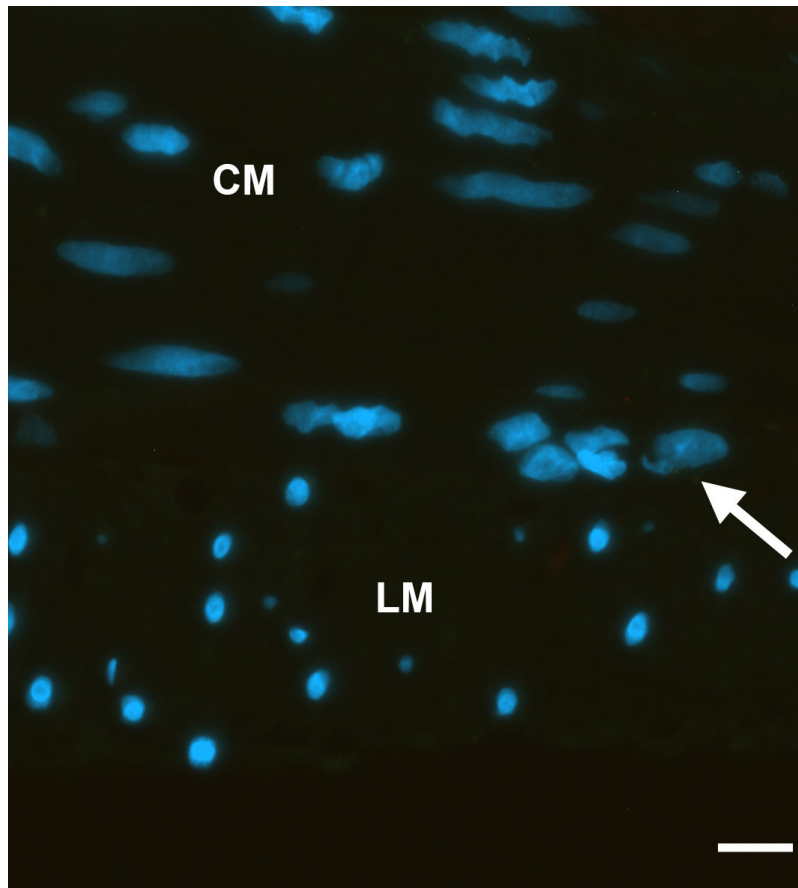

**Figure S2.** Representative fluorescent micrograph of a paraffin section of myenteric ganglia from the ileum of a control rat showing negative control by omitting the primary antibodies against TNF $\alpha$  (green) and HuCD (red). Fluorescent mounting medium containing DAPI was applied for better visualization of the structure. LM-longitudinal smooth muscle layer, CM-circular smooth muscle layer, arrow-myenteric ganglia. Scale: 10  $\mu$ m.

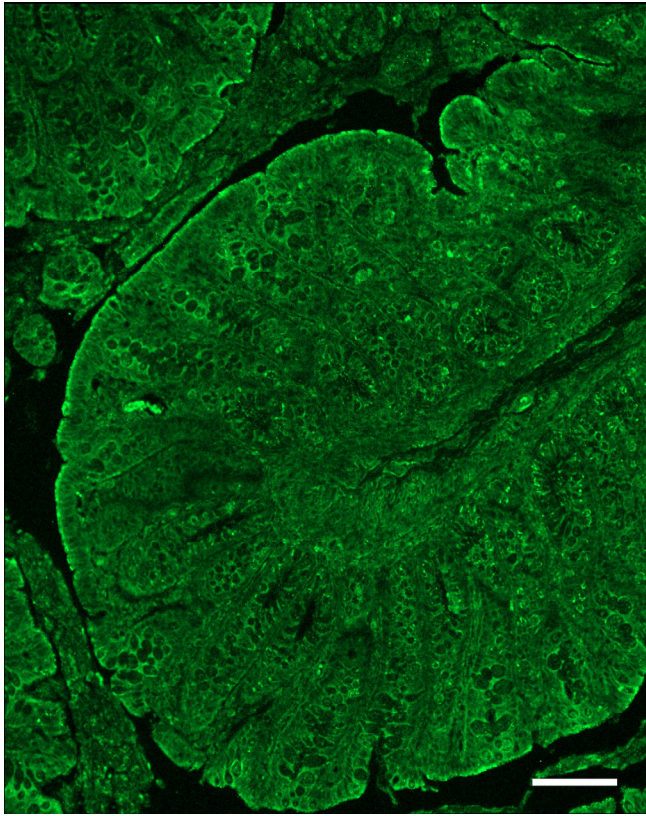

(a)

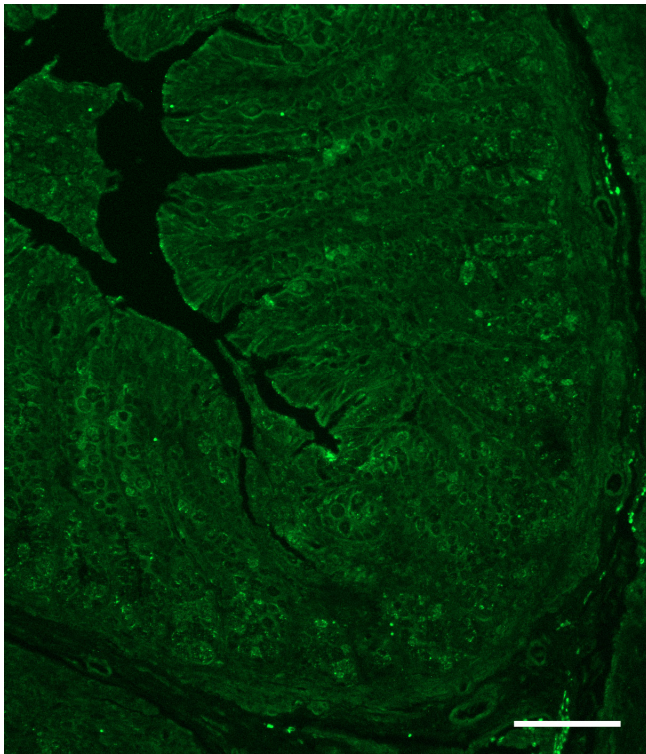

(b)

**Figure S3.** Representative fluorescent micrographs of paraffin sections of mucosal layers originated from the colon of a control (a) and diabetic (b) rat after TNF $\alpha$  fluorescent immunohistochemistry. Scale bar: 100  $\mu$ m.
